# Supplementary material for: Elaeocarpus floribundus Bl. seeds as a new source of bioactive compounds with promising antioxidant and antimicrobial properties
Source: publisher site journal article supplement (doi:10.1515/znc-2020-0114), 2020-10-15
Supplement: Supplementary file 1 [file j_znc-2020-0114_suppl.docx]

***Elaeocarpus floribundus* Bl. seeds as a new source of bioactive compounds with promising antioxidant and antimicrobial properties**

Ayorinde V. Ogundele1, 2, 3, Saikat Haldar4, Archana Yadav5 and Archana M. Das1,2*

*1Natural Products Chemistry Group, Chemical Science and Technology Division,*

*CSIR-North East Institute of Science and Technology Jorhat-785006, Assam, India*

*2 Academy of Scientific and Innovative Research (AcSIR), Ghaziabad-201002, India*

*3 Department of Chemistry, College of Pure and Applied Sciences, Kwara State*

*University, Malete, P. M. B. 1530, Ilorin-240243, Nigeria*

*4Medicinal, Aromatic and Economic Plants Group, Biological Sciences and*

*Technology Division, CSIR‐North East Institute of Science and Technology,*

*Jorhat-785006, Assam, India*

*5Biotechnology Group, Biological Science and Technology Division,*

*CSIR- North East Institute of Science and Technology, Jorhat-785006, Assam, India*

*****Corresponding author: [archanads2@gmail.com](mailto:archanads2@gmail.com)

Supplementary data


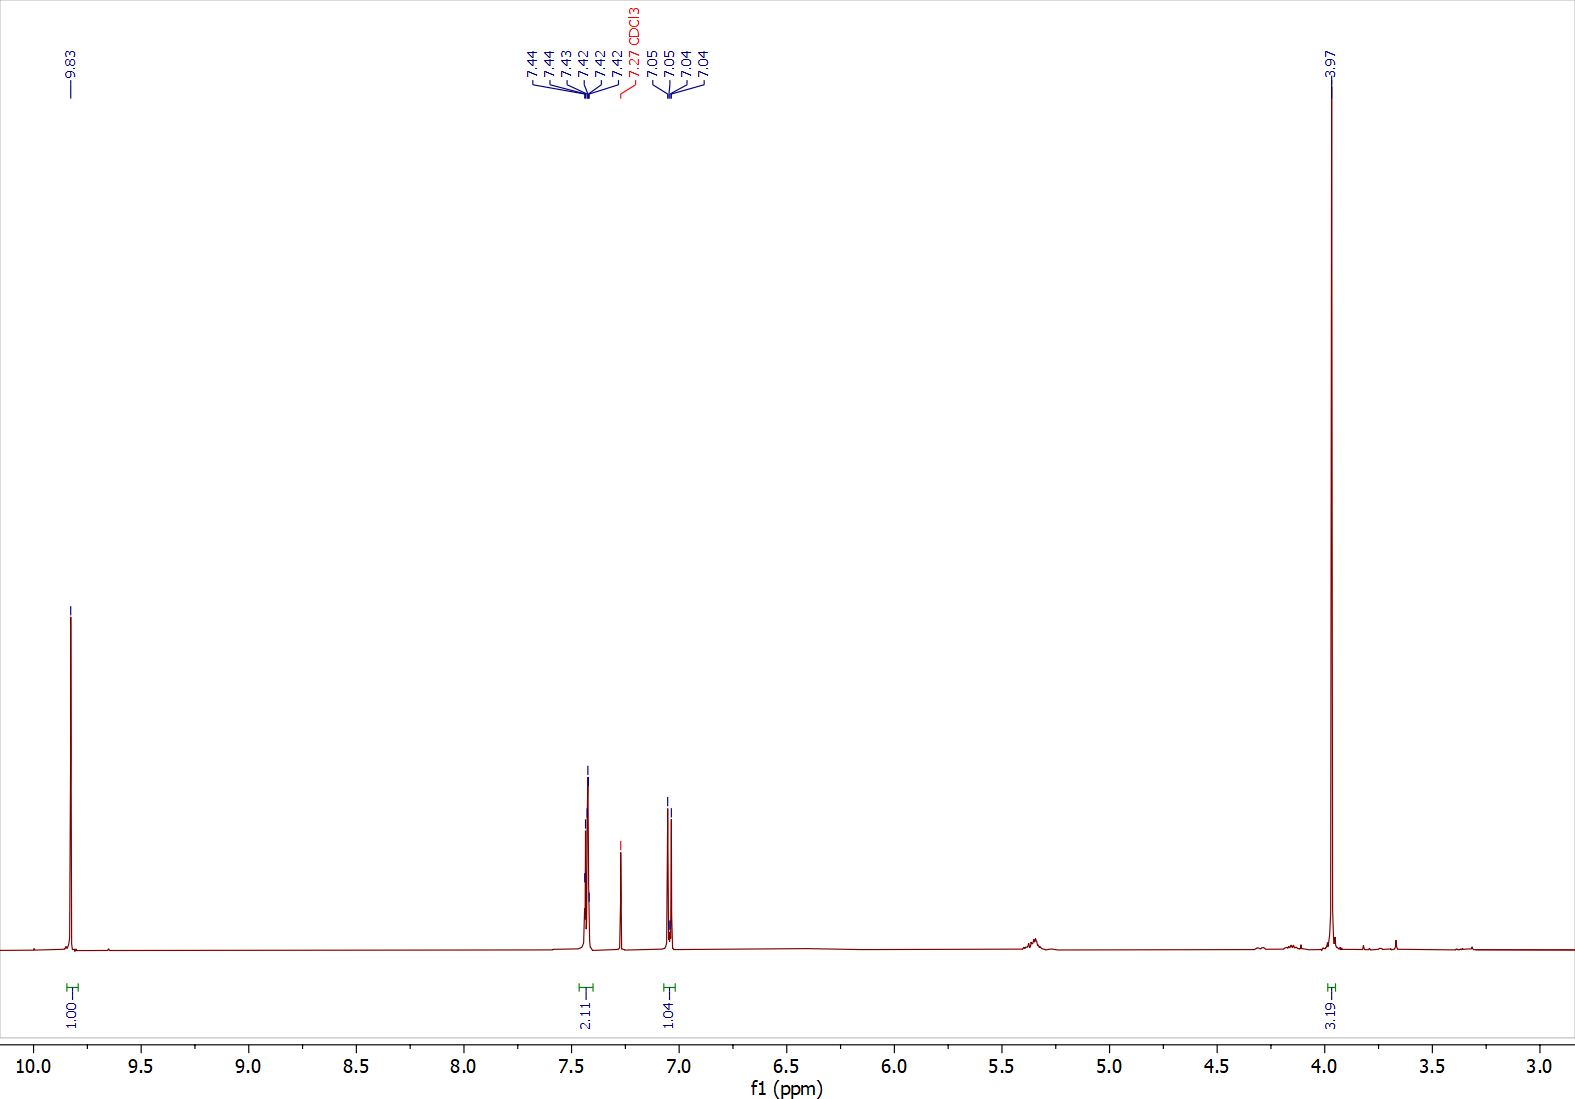


1H-NMR spectrum of compound **1** (500 MHz, CDCl3)


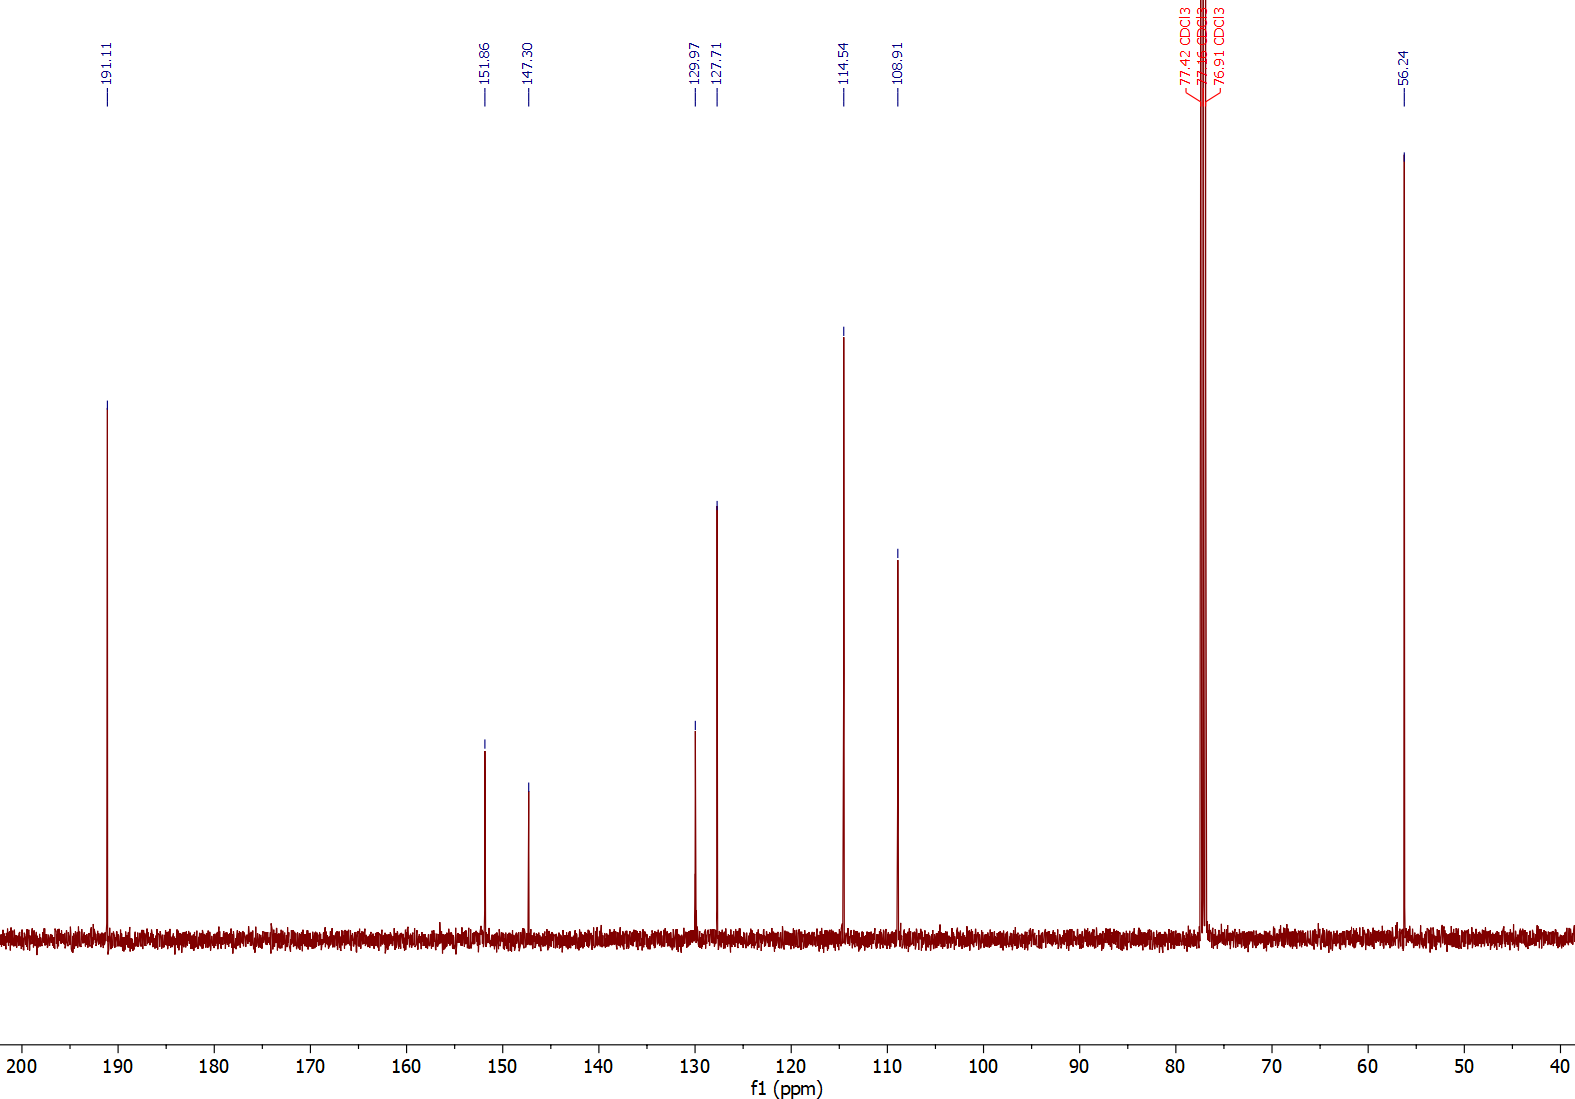


13C-NMR spectrum of compound **1** (125 MHz, CDCl3)


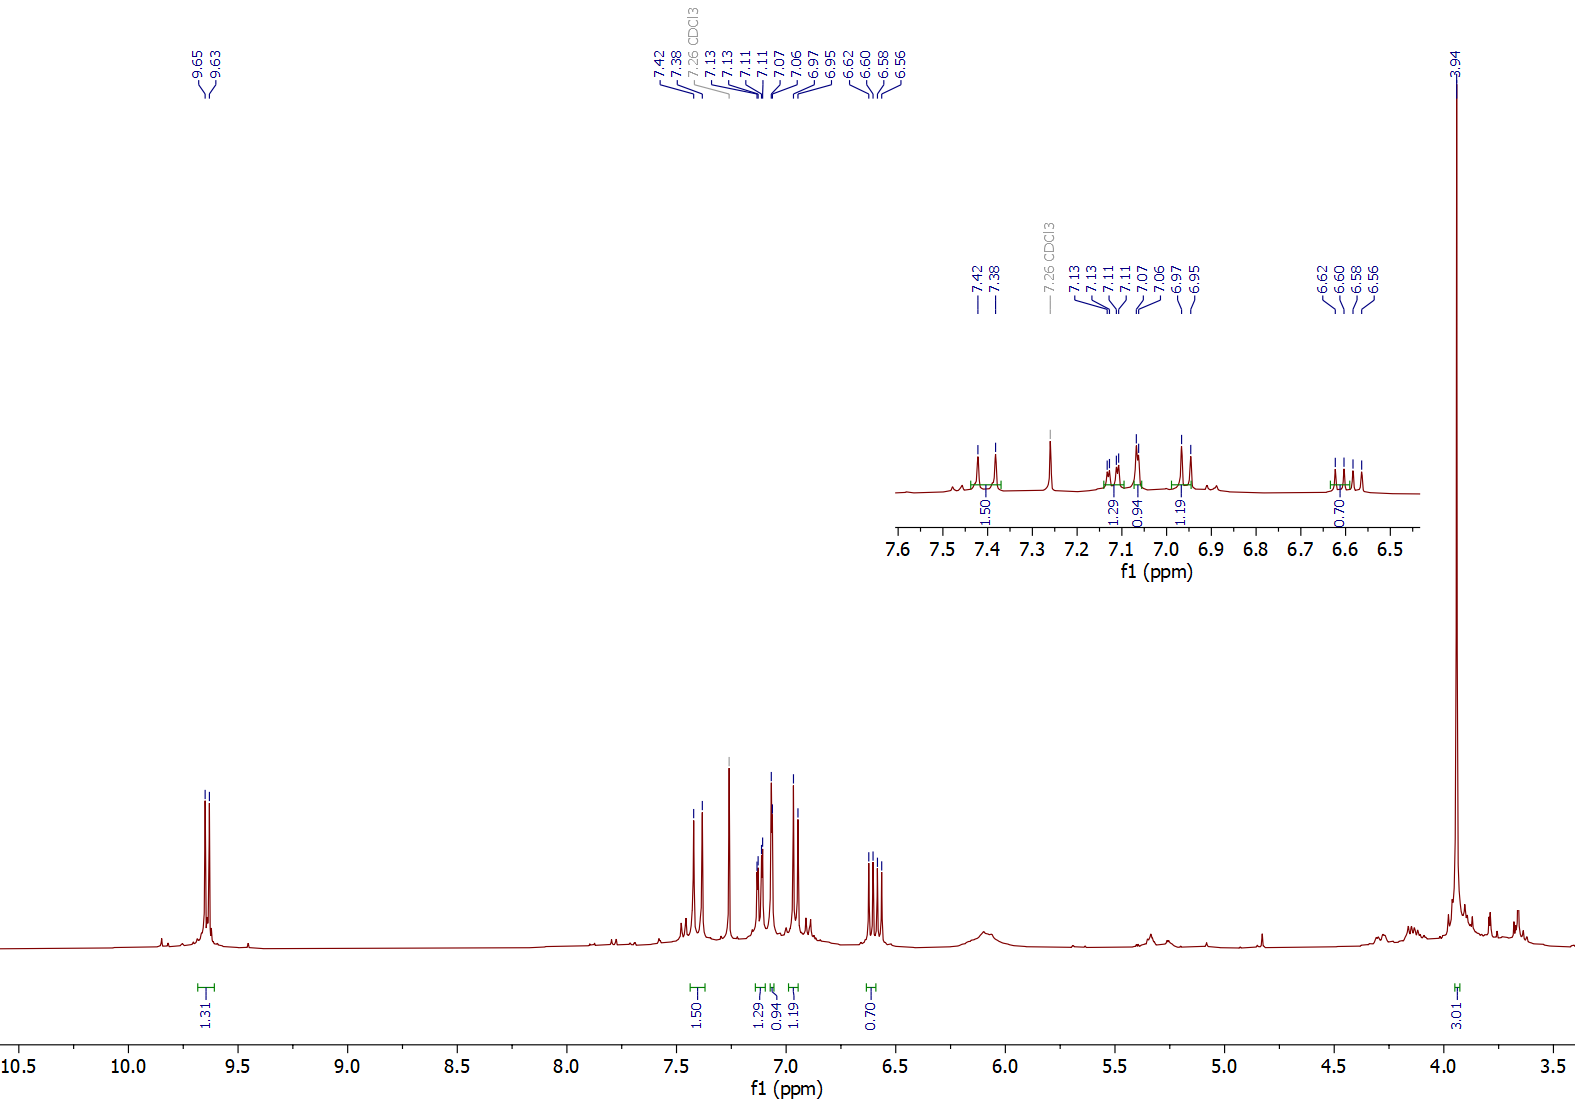


1H-NMR spectrum of compound **2** (400 MHz, CDCl3)


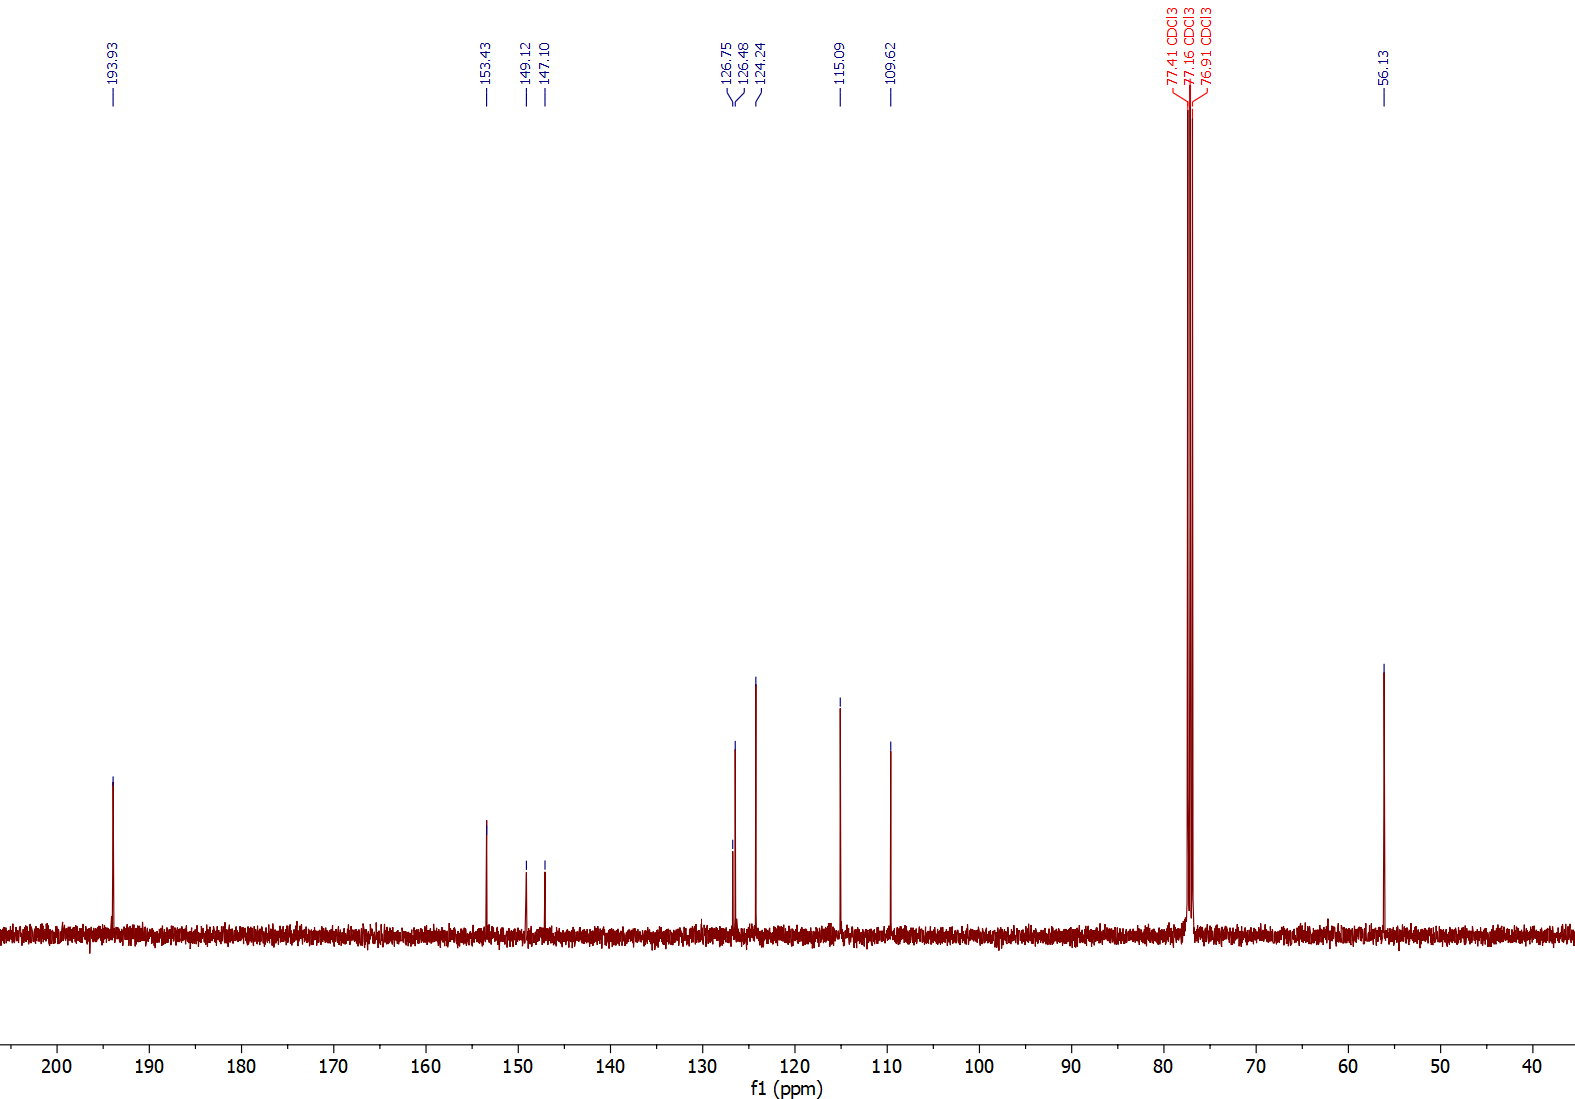


13C-NMR spectrum of compound **2** (125 MHz, CDCl3)


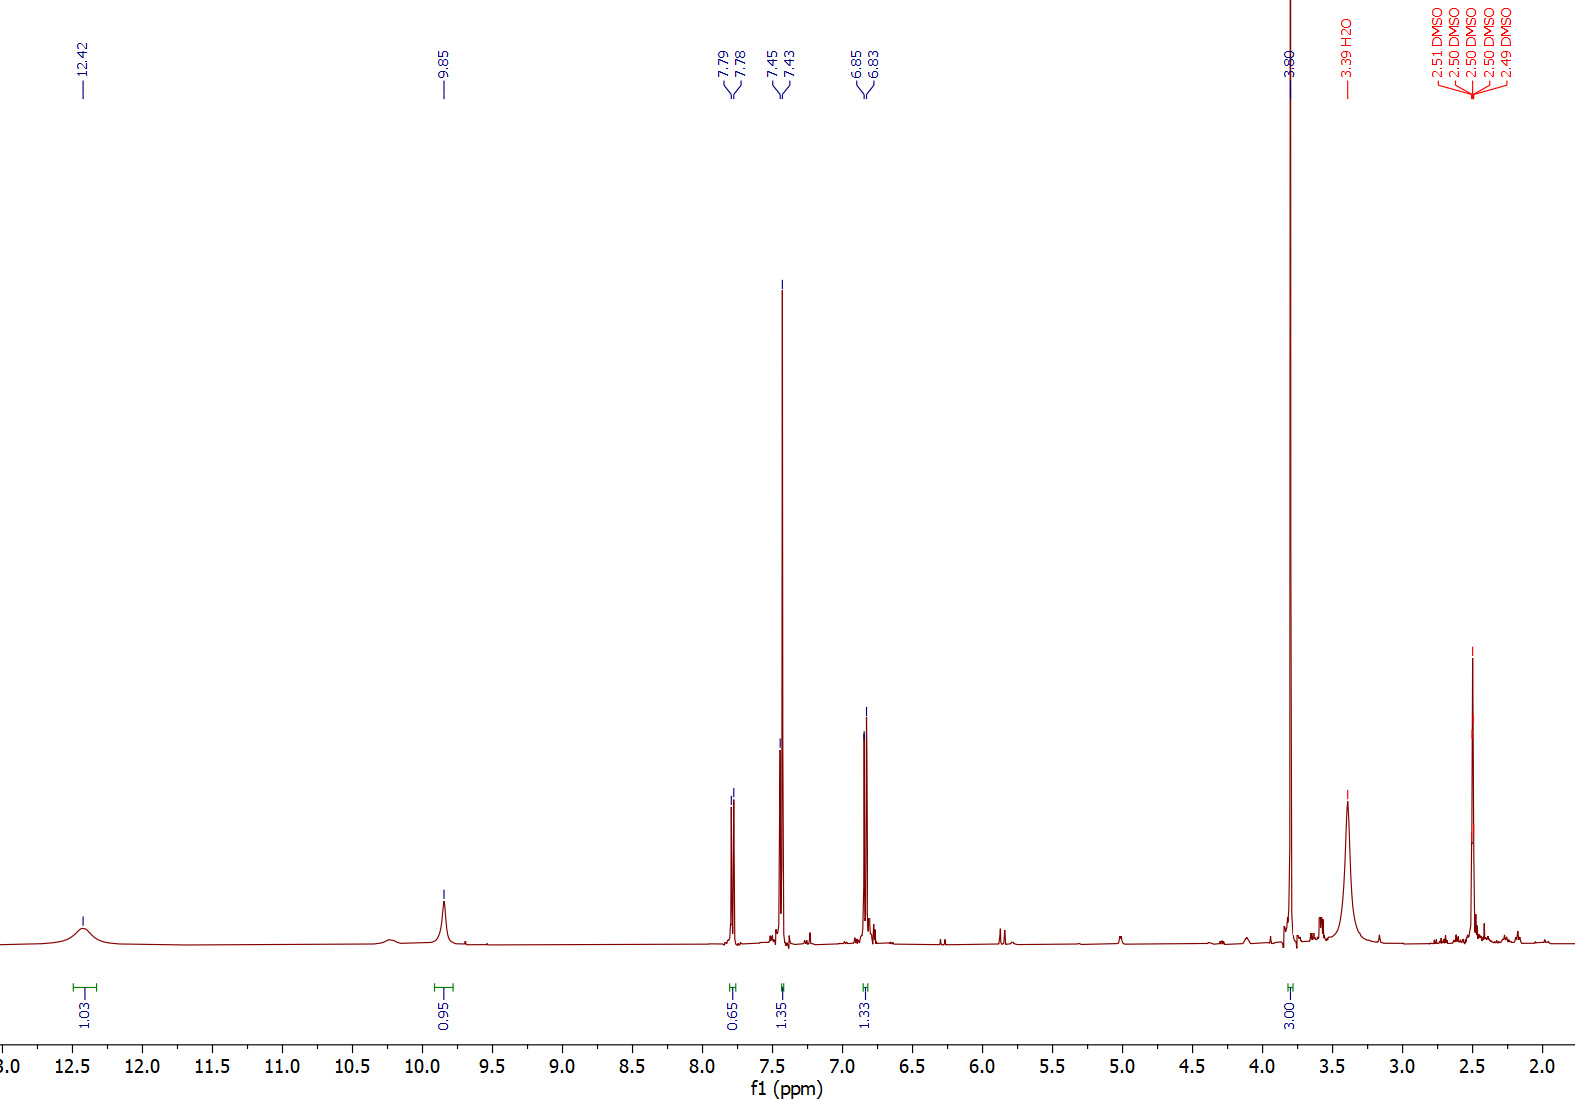


1H-NMR spectrum of compound **3** (500 MHz, dmso-*d*6)


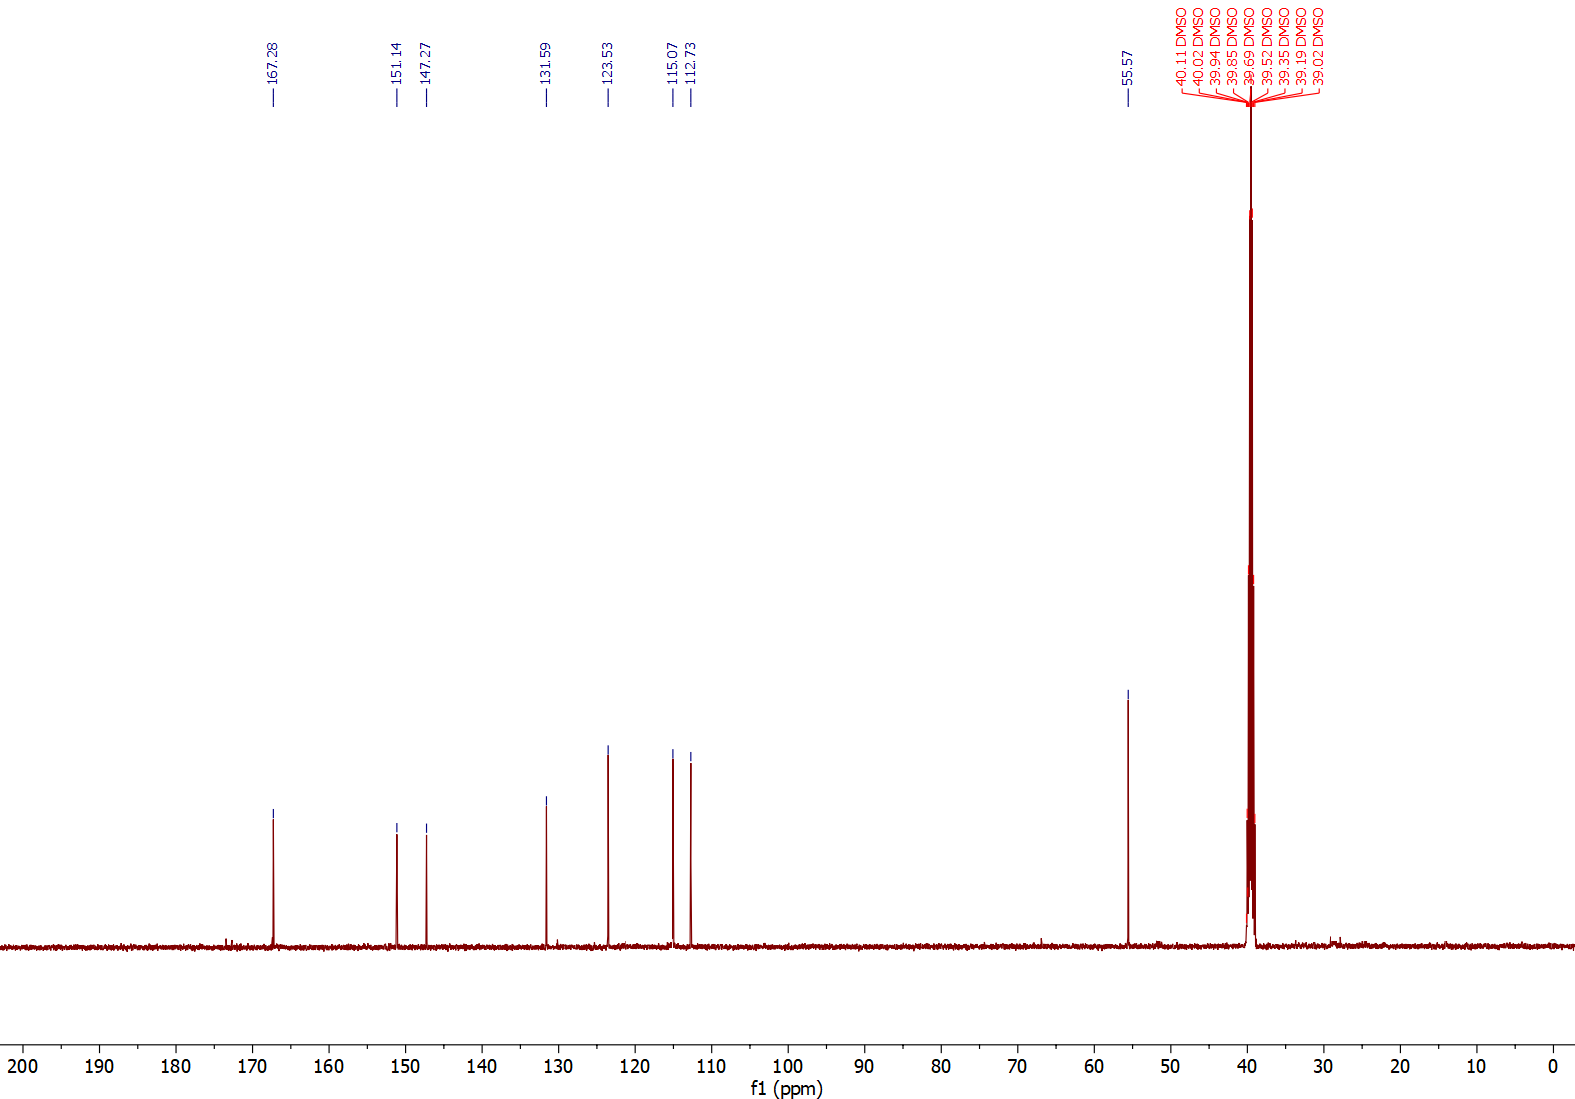


13C-NMR spectrum of compound **3** (125 MHz, dmso-*d*6)


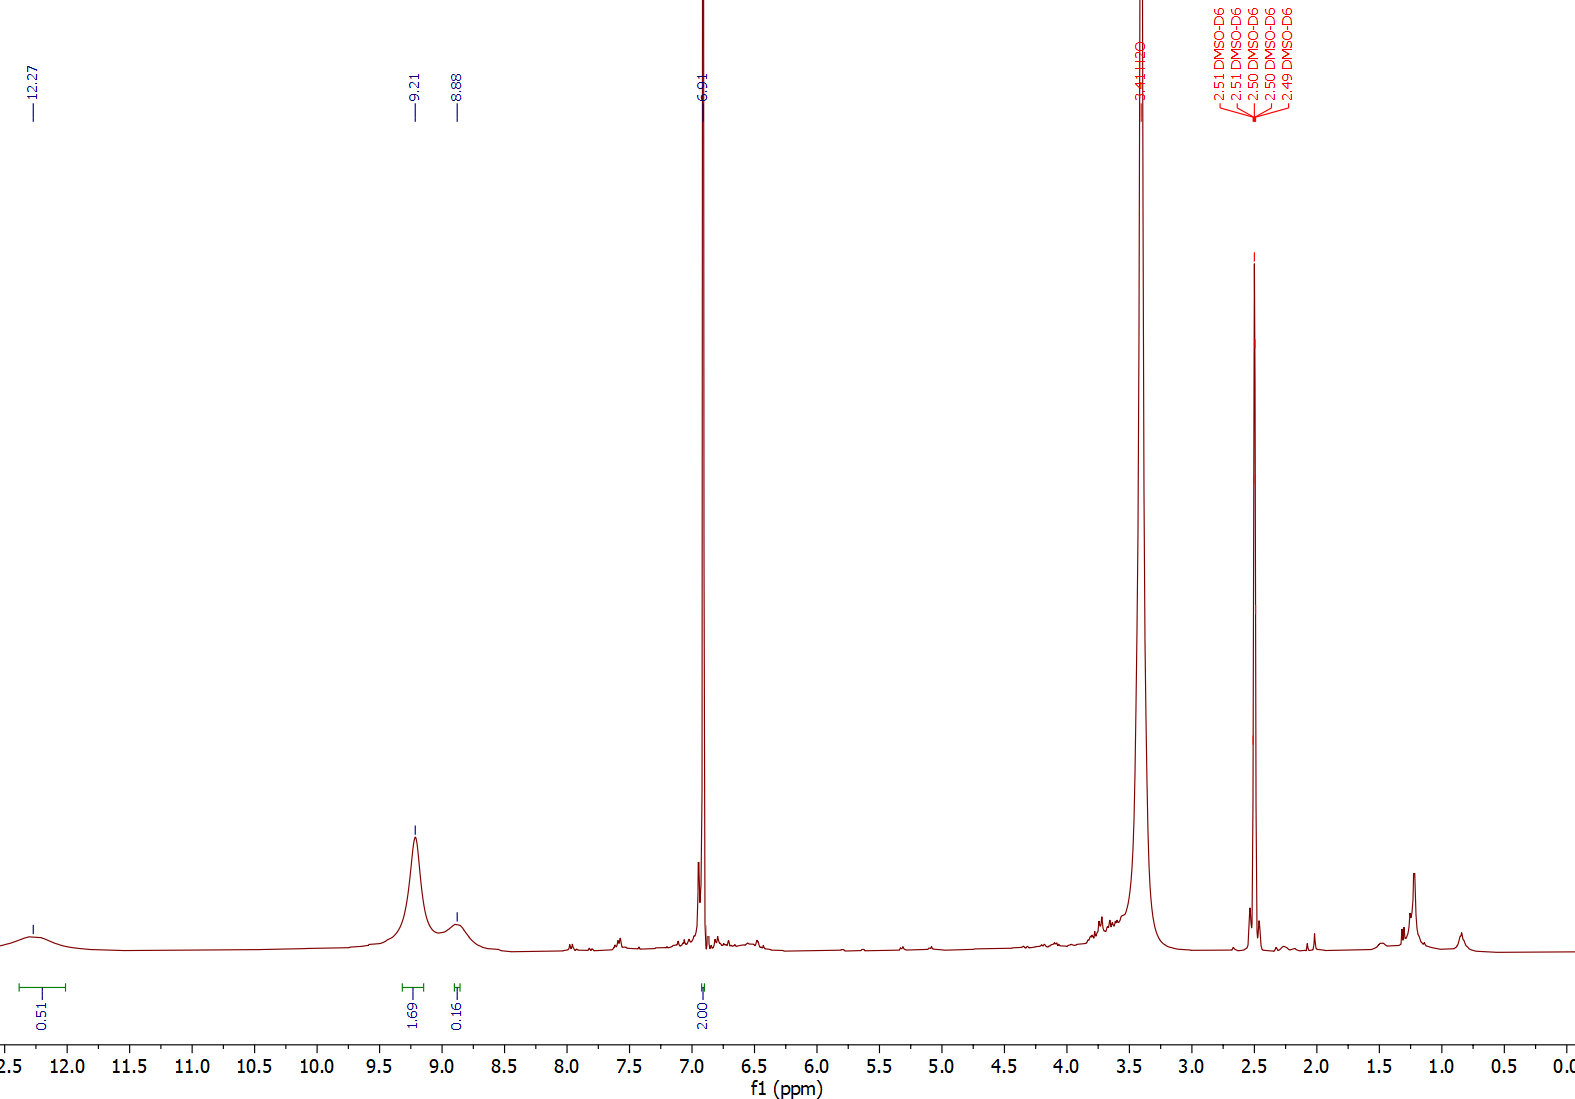


1H-NMR spectrum of compound **4** (400 MHz, dmso-*d*6)


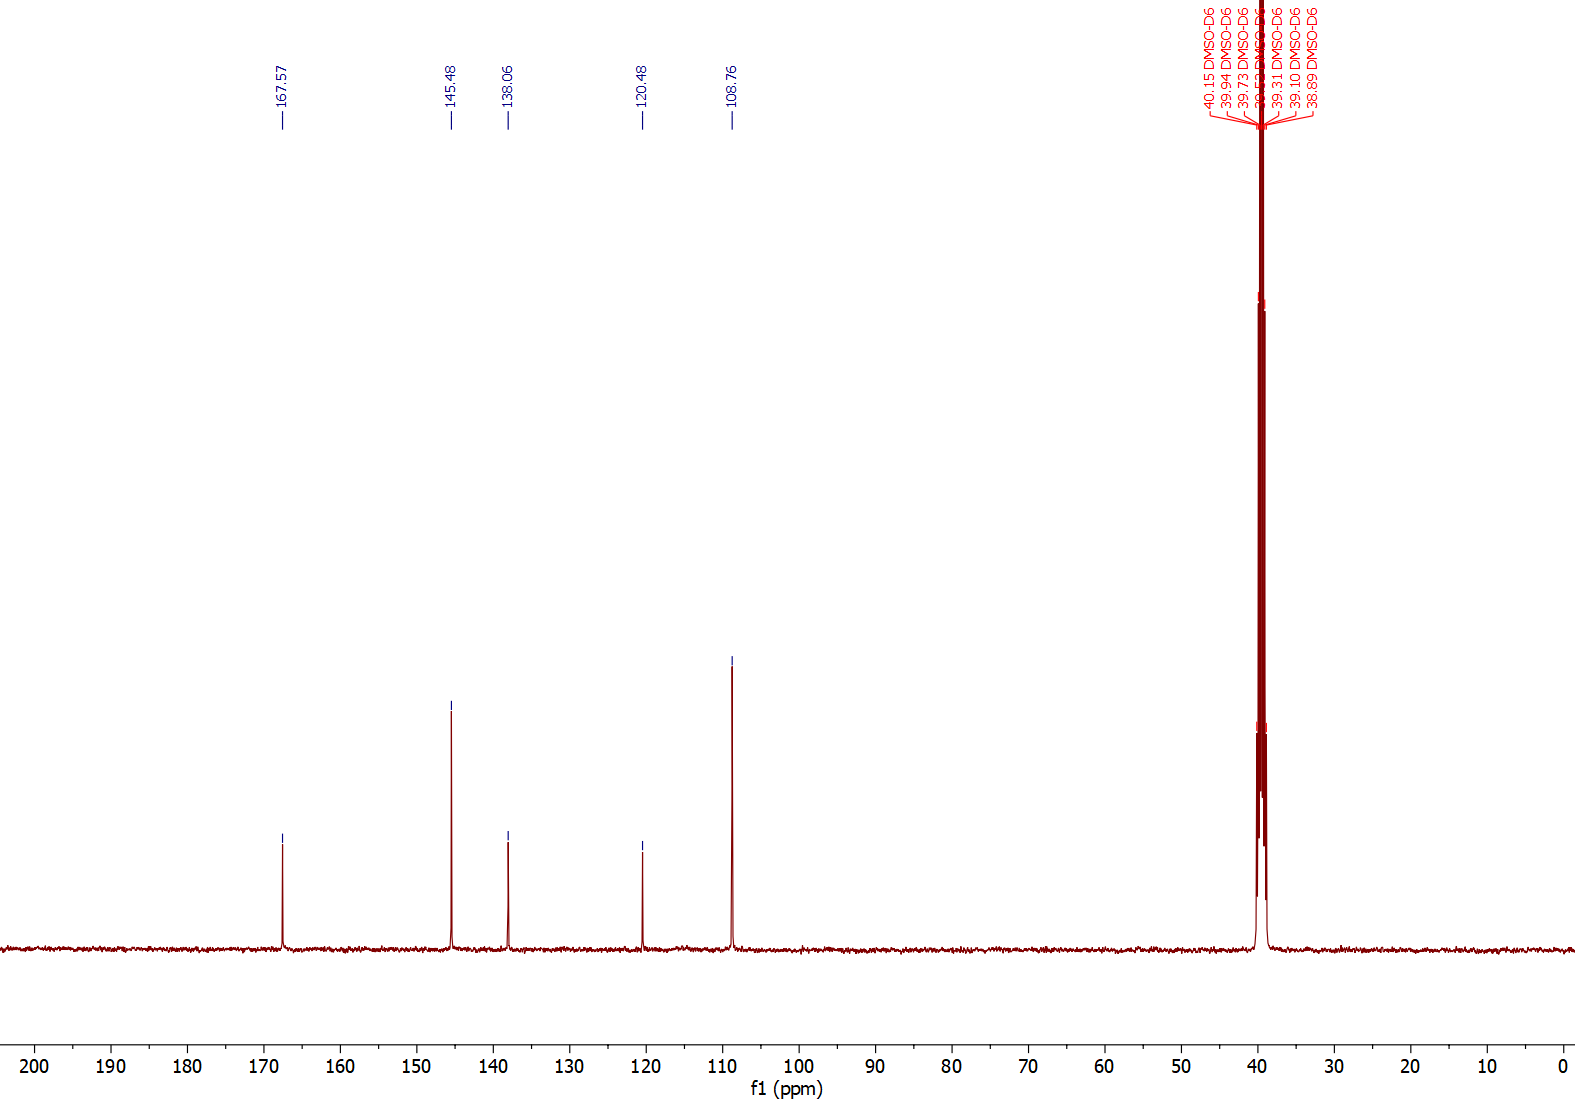


13C-NMR spectrum of compound **4** (100 MHz, dmso-*d*6)


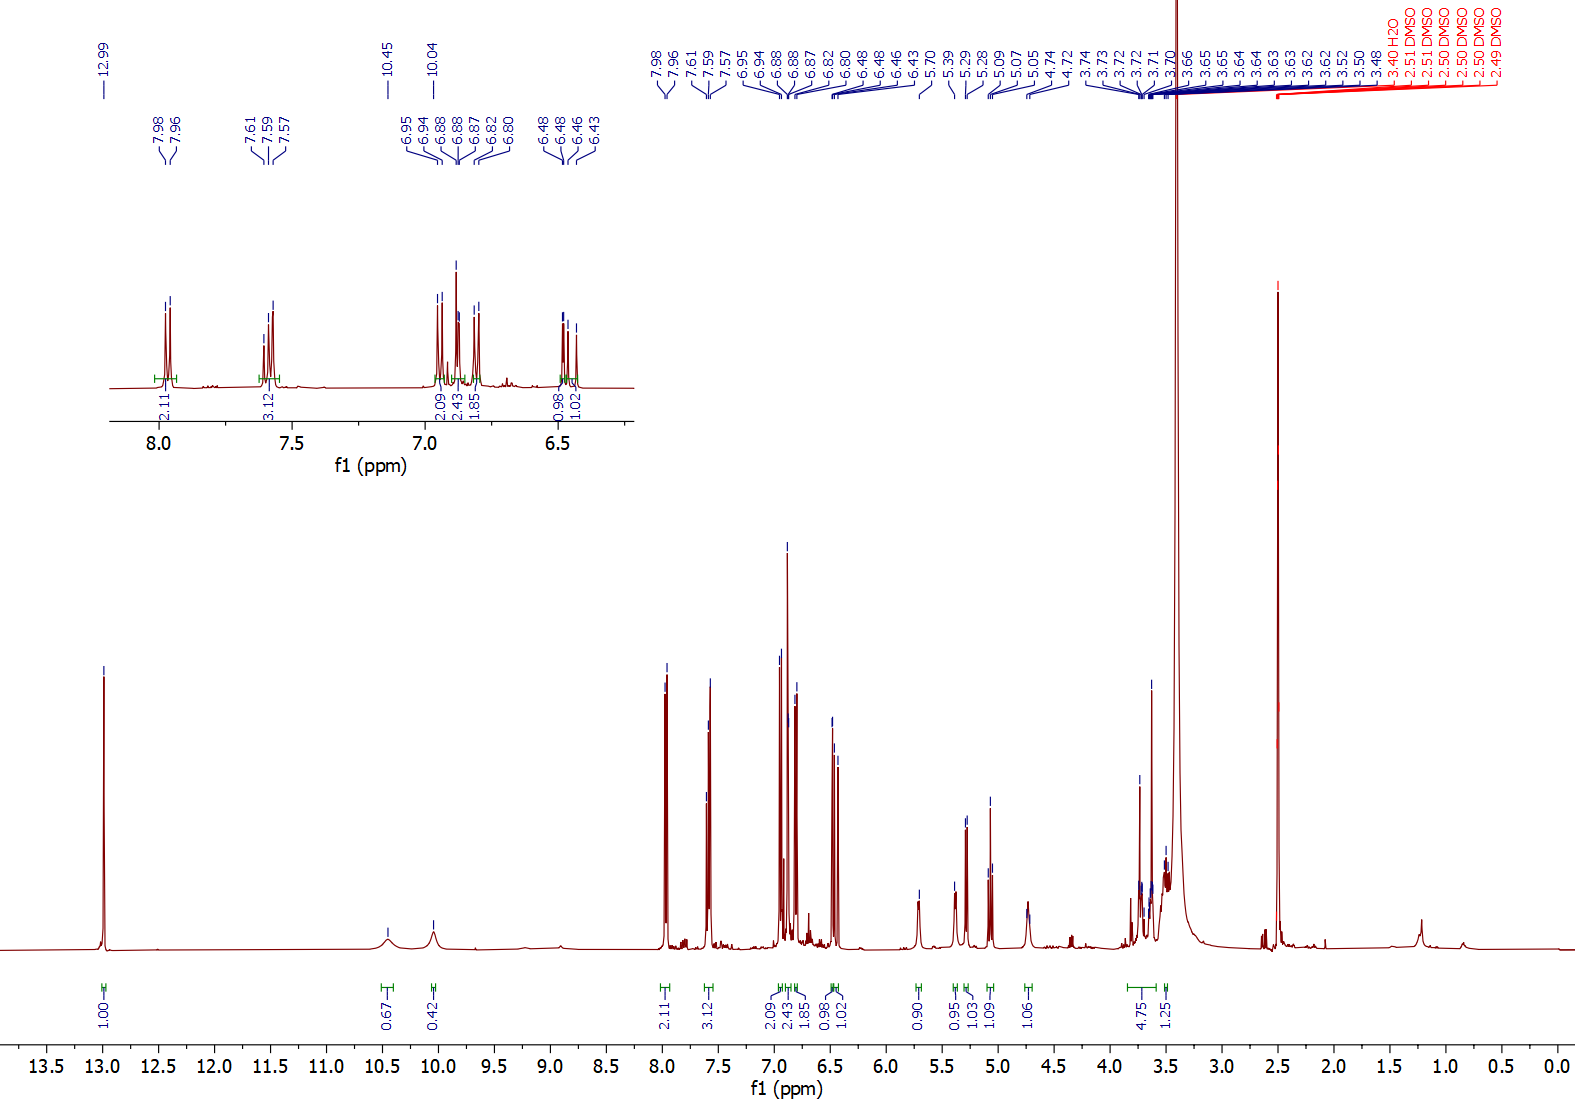


1H-NMR spectrum of compound **5** (500 MHz, dmso-*d*6)


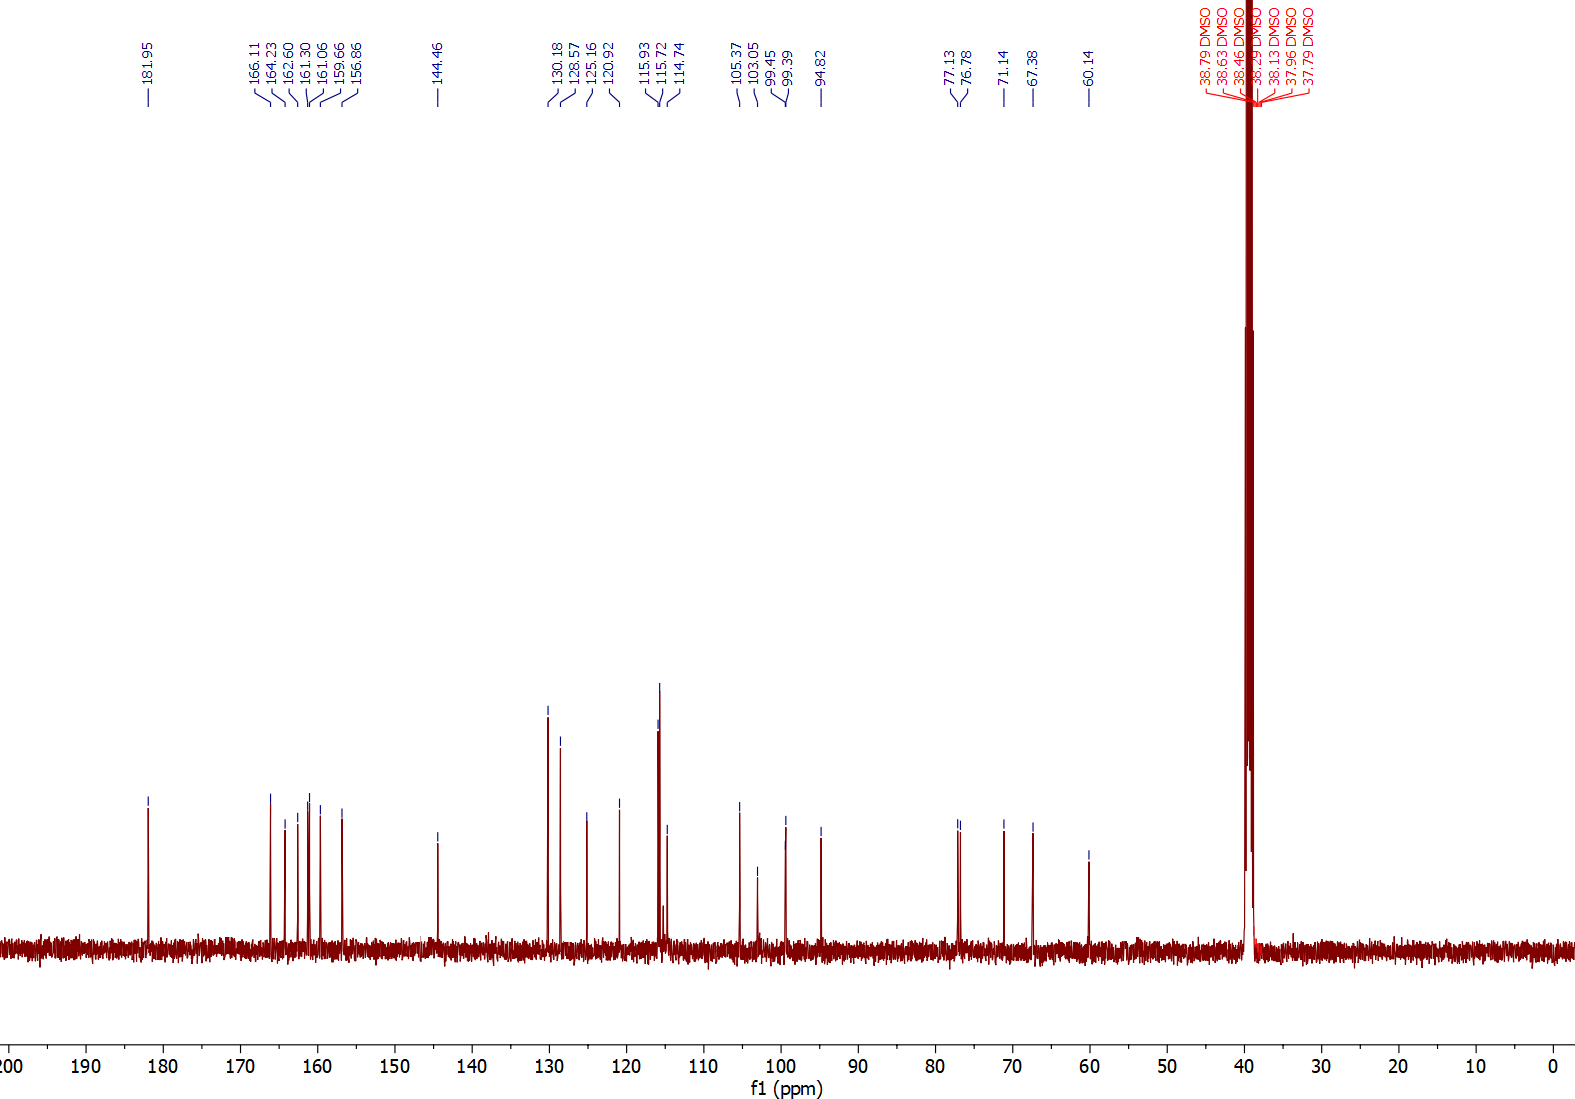


13C-NMR spectrum of compound **5** (125 MHz, dmso-*d*6)


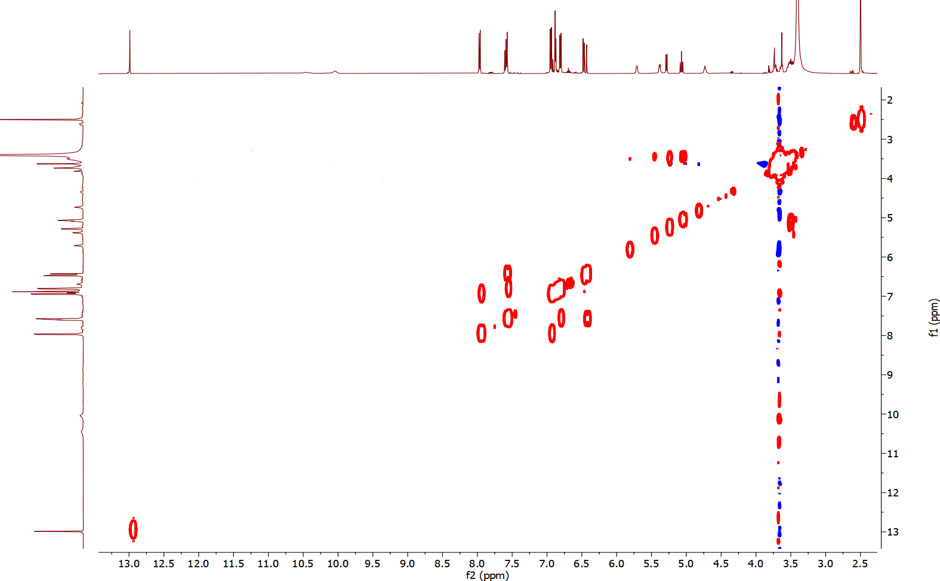


1H-1H COSY spectrum of compound **5** (500 MHz, dmso-*d*6)


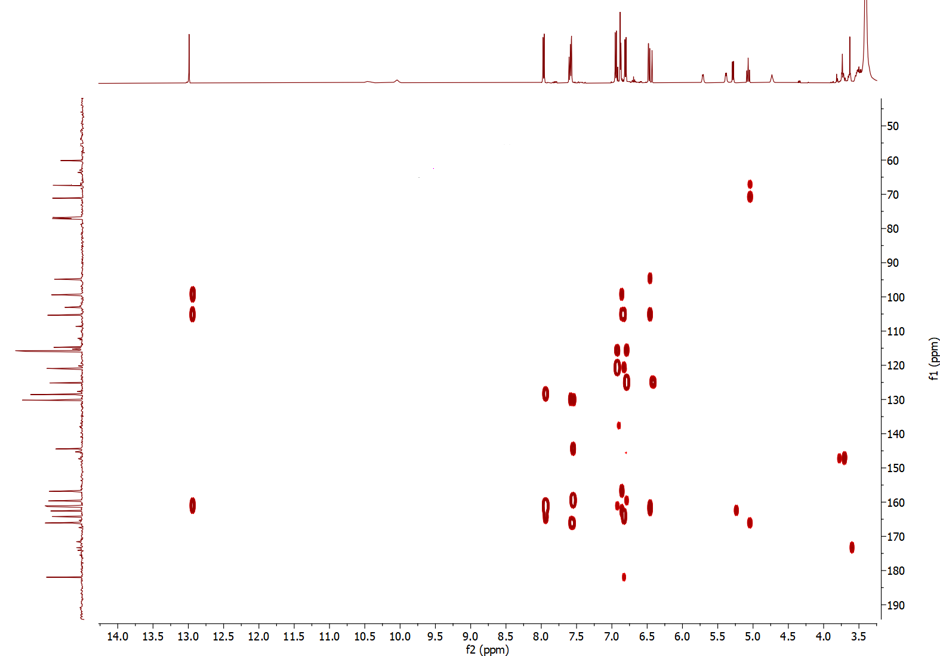


HMBC spectrum of compound **5** (500 MHz, dmso-*d*6)


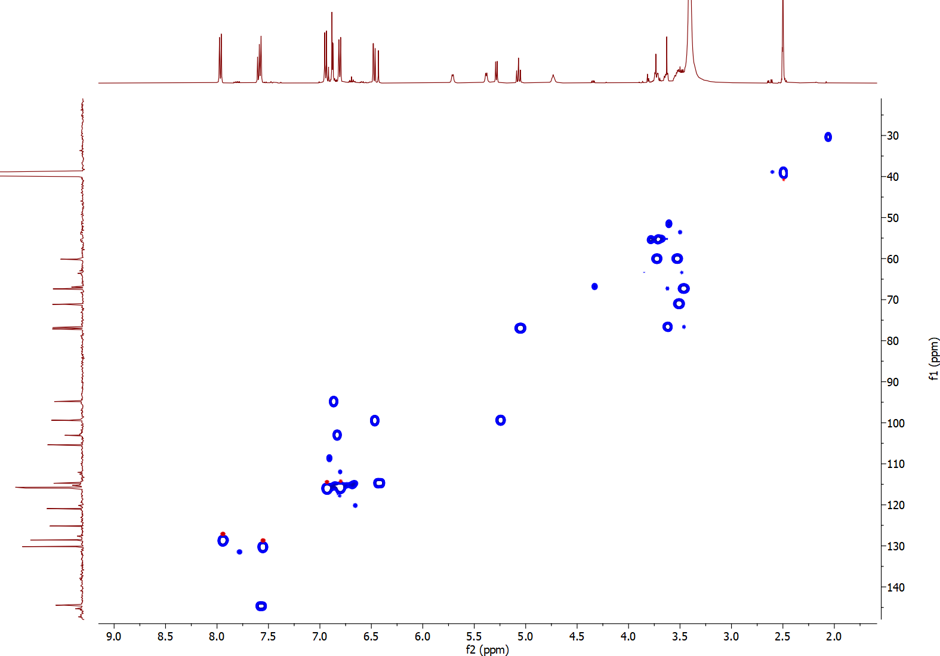


HSQC spectrum of compound **5** (500 MHz, dmso-*d*6)


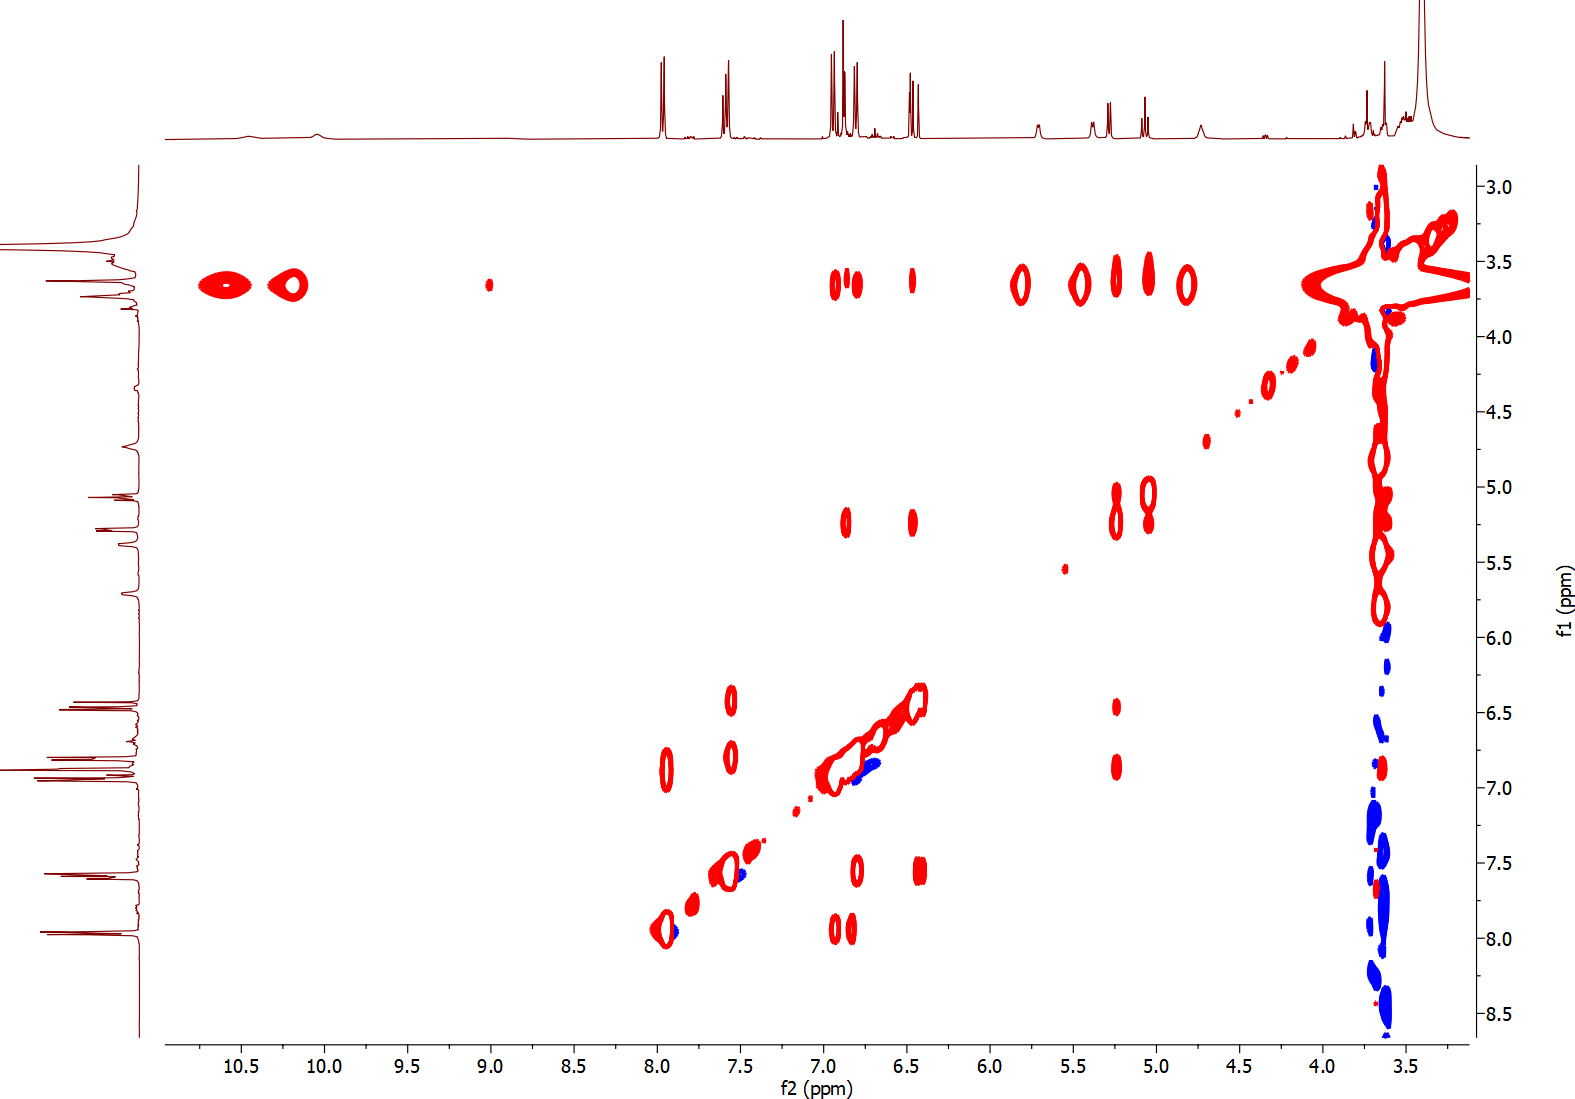


NOESY spectrum of compound **5** (500 MHz, dmso-*d*6)


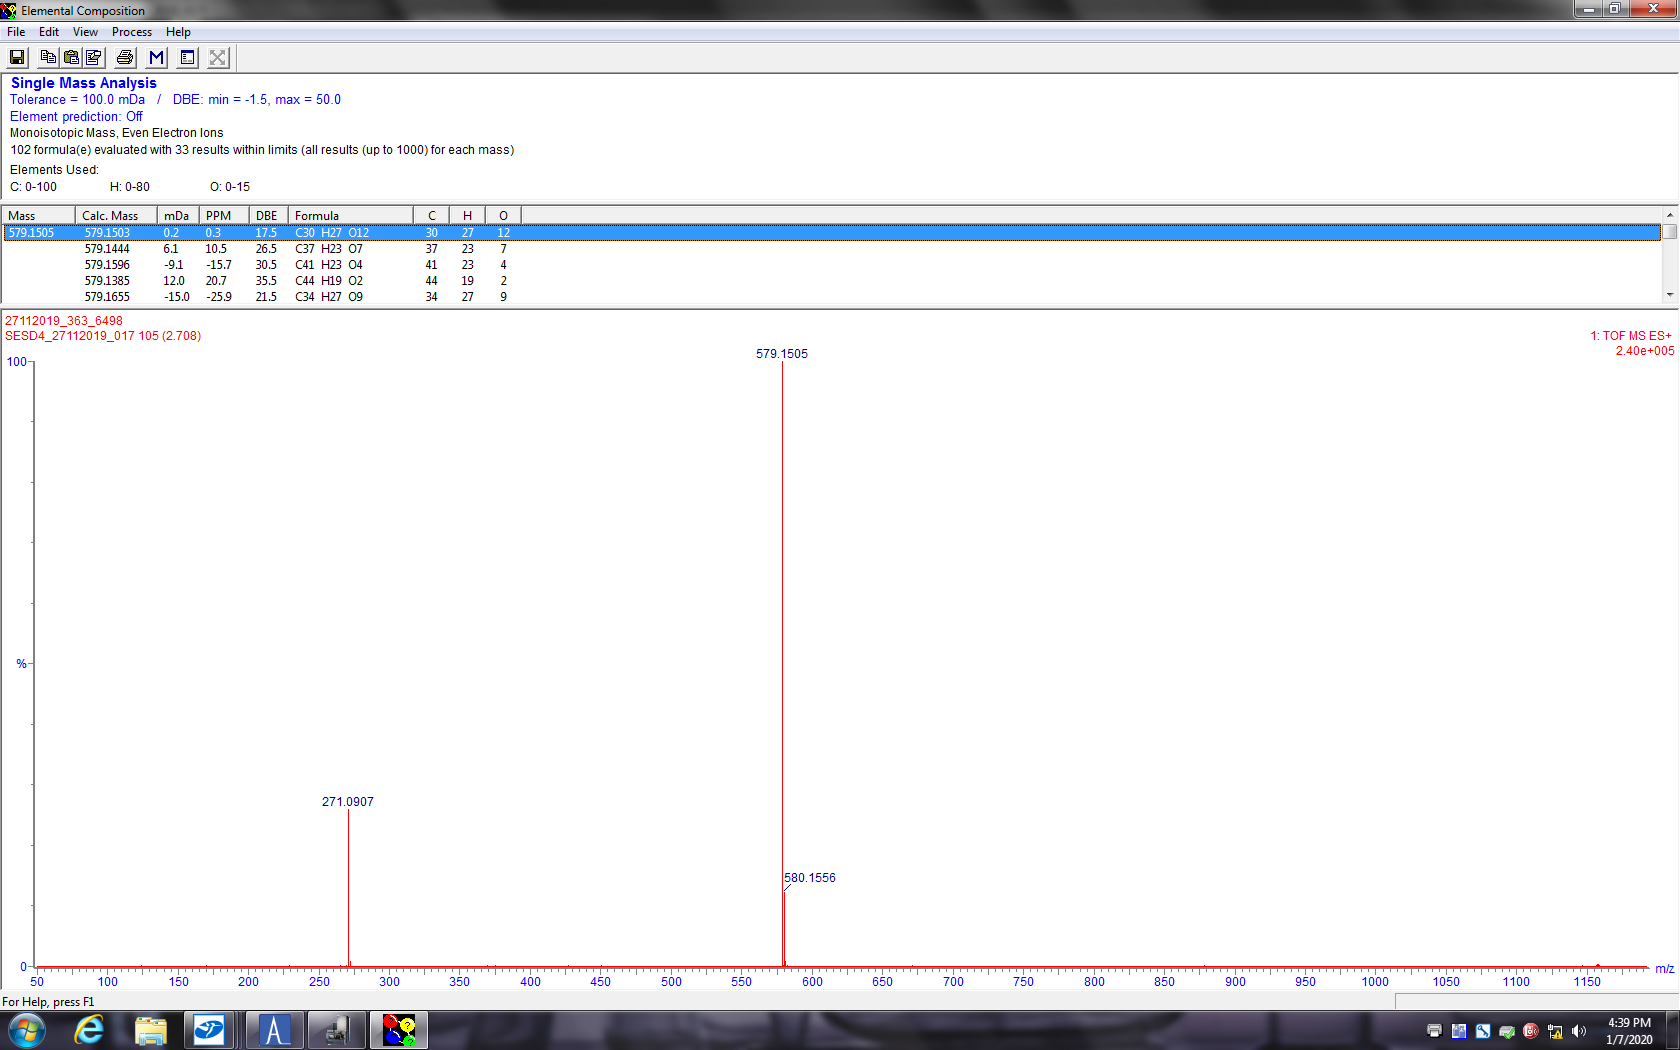


HR-ESI-MS of compound **5**
